# Supplementary material for: Differences in Local and Systemic TFV PK Among Premenopausal Versus Postmenopausal Women Exposed to TFV 1% Vaginal Gel
Source: PubMed Central journal article supplement (PMC5902131; doi:10.1097/qai.0000000000001648), 2018-02-07

Supplemental Figure 1: Premenopausal and Postmenopausal Populations

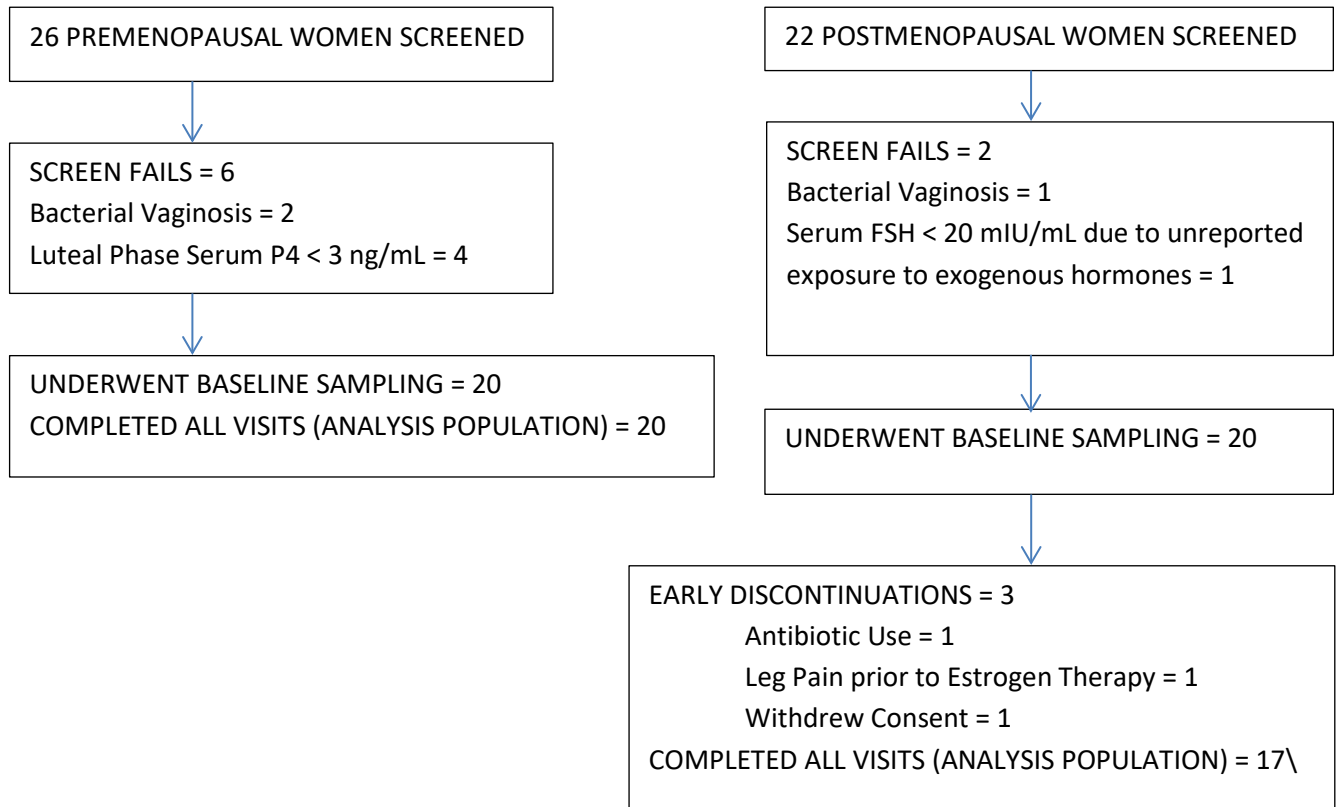

Supplemental Table 1: Analysis Populations

| Variable                                    | Premenopausal (PRE) Cohort (n = 20) |            |     | Postmenopausal (POST) Cohort (n = 17) |            |      | p value |
|---------------------------------------------|-------------------------------------|------------|-----|---------------------------------------|------------|------|---------|
|                                             | N                                   | Mean       | STD | N                                     | Mean       | STD  |         |
| Age (Years)                                 | 20                                  | 35.2       | 6   | 17                                    | 60.6       | 9.3  | < 0.01  |
| Years of Education                          | 20                                  | 14         | 1.5 | 17                                    | 13.8       | 2.2  | 0.89    |
| GRAVIDITY                                   | 20                                  | 3.1        | 1.6 | 17                                    | 3.2        | 3.2  | 0.40    |
| PARITY                                      | 20                                  | 2.5        | 1.4 | 17                                    | 2.4        | 1.9  | 0.70    |
| Body Mass Index (kg/m <sup>2</sup> )        | 20                                  | 31.9       | 9.8 | 17                                    | 29.3       | 6.2  | 0.53    |
| Systolic Blood Pressure (mm Hg)             | 20                                  | 115.3      | 18  | 17                                    | 129.8      | 20.1 | 0.02    |
| Diastolic Blood Pressure (mm Hg)            | 20                                  | 71.9       | 9.7 | 17                                    | 76.4       | 13.4 | 0.09    |
| Vaginal pH at Screening (Visit 1)           | 20                                  | 4.3        | 0.3 | 17                                    | 5.3        | 0.7  | < 0.01  |
| Vaginal Nugent Score at Screening (Visit 1) | 20                                  | 1.3        | 1.4 | 17                                    | 4.1        | 1.9  | < 0.01  |
| Race                                        | N                                   | % of Group |     | N                                     | % of Group |      | p value |
| Non-Hispanic                                | 17                                  | 85         |     | 17                                    | 100        |      | 0.15    |
| Hispanic                                    | 3                                   | 15         |     | 0                                     | 0          |      |         |
| Ethnicity                                   | N                                   | % of Group |     | N                                     | % of Group |      | p value |
| American Indian or Alaskan Native           | 1                                   | 5          |     | 0                                     | 0          |      | 0.11    |
| White                                       | 13                                  | 65         |     | 14                                    | 82         |      |         |
| Black or African American                   | 6                                   | 30         |     | 3                                     | 18         |      |         |
| Partner Information                         | N                                   | % of Group |     | N                                     | % of Group |      | p value |
| Living with Sexual Partner                  | 12                                  | 60         |     | 6                                     | 35         |      | 0.02    |
| Not Living with Sexual Partner              | 5                                   | 25         |     | 1                                     | 6          |      |         |
| No Sexual Partner                           | 3                                   | 15         |     | 10                                    | 59         |      |         |

Supplemental Figure 2: Vaginal Tissue Concentrations of TFV, TFV-MP and TFV-DP obtained from Premenopausal (PRE) women in the Follicular (FOL) and Luteal (LUT) phases (Blue) and from Postmenopausal (POST) women at baseline (BASE) and after approximately 2 months of vaginal estradiol (E2) treatment (Red). All vaginal tissues obtained 3 hours post TFV gel dosing.

Fig 2a: Tissue TFV (ng/mg) in PRE and POST Cohorts

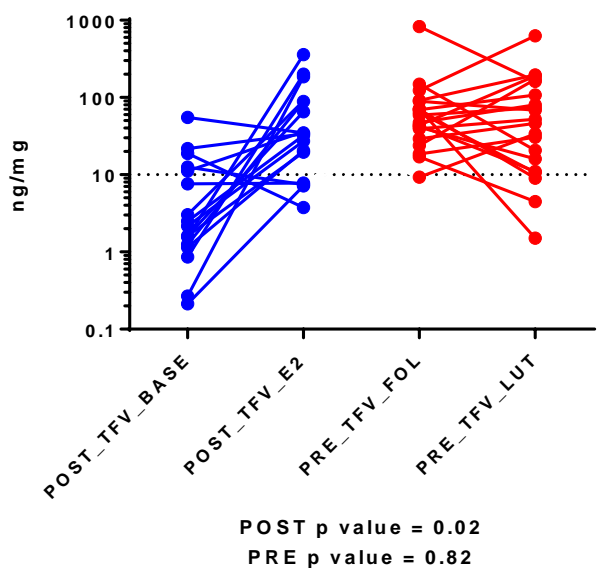

Fig 2b: Tissue TFV-MP (fmol/gram) in PRE and POST Cohorts

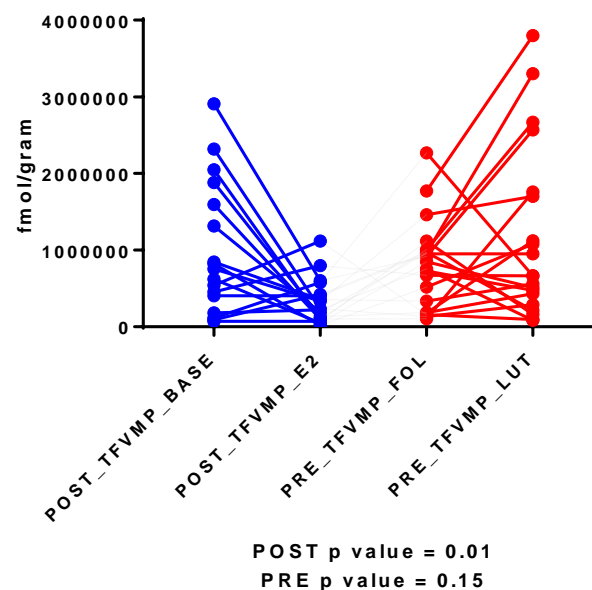

Fig 2c: Tissue TFV-DP (fmol/mg) in PRE and POST Cohorts

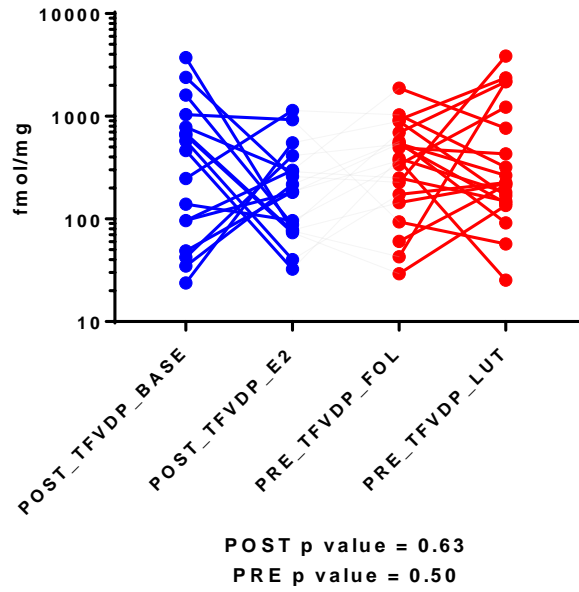

Fig 2d: Tissue Molecular Ratio TFV-DP/TFV in PRE and POST Cohorts

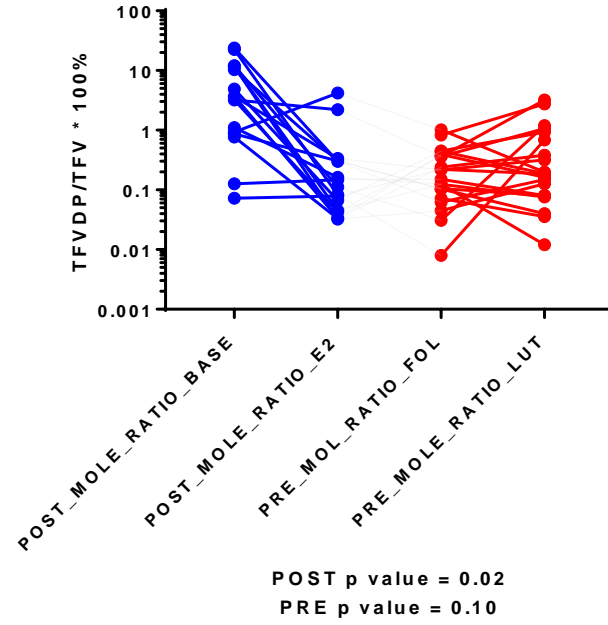

Supplemental Figure 3: Endogenous nucleotide concentrations (fmol/gram) among Premenopausal (PRE) women (in Follicular (FOL) (Visit 4) and Luteal (LUT) (Visit 5) phases combined) (blue) versus Postmenopausal (POST) women at baseline (BASE) before (Visit 3) (red) versus after treatment with 2 months of topical estradiol (E2) cream (Visit 6) (green).

Figure 3a dATP in PRE vs. POST before and after E2 Tx

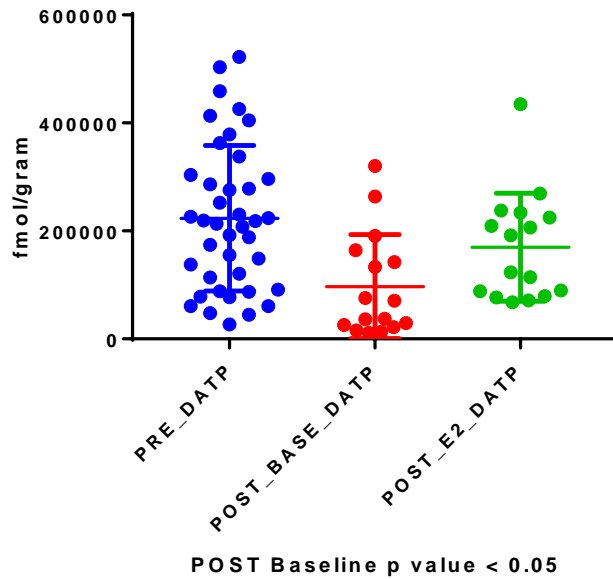

Figure 3b: DCTP in PRE vs. POST before vs after E2 Tx

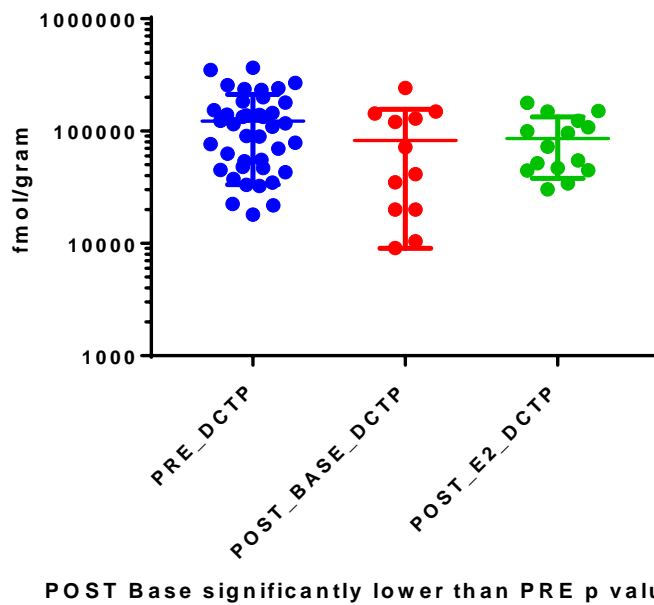

Supplement: qai-78-82-s001.pdf [file qai-78-82-s001.pdf]
